# Supplementary material for: Circular RNA hsa_circ_0001649 inhibits hepatocellular carcinoma progression via multiple miRNAs sponge
Source: publisher site journal article supplement (doi:10.18632/aging.101988), 2019-05-28
Supplement: Supplementary file [file aging-v11i10-101988-supplementary-material-SD1.pdf]

## SUPPLEMENTARY MATERIAL

Supplementary Table 1. Relationship between circ-0001649 expression and clinicopathological characteristics of HCC patients.

| Clinicopathological characteristics      | n         | High expression | Low expression | $\chi^2$ | P value       |
|------------------------------------------|-----------|-----------------|----------------|----------|---------------|
| <b>Total</b>                             | <b>84</b> | <b>42</b>       | <b>42</b>      |          |               |
| <b>Gender</b>                            |           |                 |                | 0.263    | 0.608         |
| Male                                     | 64        | 31              | 33             |          |               |
| Female                                   | 20        | 11              | 9              |          |               |
| <b>Age (years)</b>                       |           |                 |                | 0.048    | 0.823         |
| ≤54                                      | 41        | 21              | 20             |          |               |
| >54                                      | 43        | 21              | 22             |          |               |
| <b>Grade of differentiation</b>          |           |                 |                | 7.336    | <b>0.026*</b> |
| Low                                      | 32        | 10              | 22             |          |               |
| Middle                                   | 30        | 18              | 12             |          |               |
| High                                     | 22        | 14              | 8              |          |               |
| <b>Tumor diameter (cm)</b>               |           |                 |                | 0.191    | 0.662         |
| ≤5                                       | 40        | 21              | 19             |          |               |
| >5                                       | 44        | 21              | 23             |          |               |
| <b>Liver function (Child-Pugh stage)</b> |           |                 |                | 0.081    | 0.776         |
| A                                        | 69        | 35              | 34             |          |               |
| B or C                                   | 15        | 7               | 8              |          |               |
| <b>Hepatocirrhosis</b>                   |           |                 |                | 0.933    | 0.334         |
| Absent                                   | 24        | 14              | 10             |          |               |
| Present                                  | 60        | 28              | 32             |          |               |
| <b>HBV infection</b>                     |           |                 |                | 0.808    | 0.369         |
| Absent                                   | 32        | 18              | 14             |          |               |
| Present                                  | 52        | 24              | 28             |          |               |
| <b>HCV infection</b>                     |           |                 |                |          | 1.000         |
| Absent                                   | 83        | 42              | 41             |          |               |
| Present                                  | 1         | 0               | 1              |          |               |
| <b>AFP (ng/ml)</b>                       |           |                 |                | 0.763    | 0.382         |
| ≤20                                      | 44        | 24              | 20             |          |               |
| >20                                      | 40        | 18              | 22             |          |               |
| <b>Tumor satellite</b>                   |           |                 |                | 7.244    | <b>0.007*</b> |
| Absent                                   | 61        | 36              | 25             |          |               |
| Present                                  | 23        | 6               | 17             |          |               |

Two-sided  $\chi^2$  for all variables except HCV infection between Low expression group and High expression group, HCV infection was evaluated using Fisher's exact test, \*P<0.05.

**A**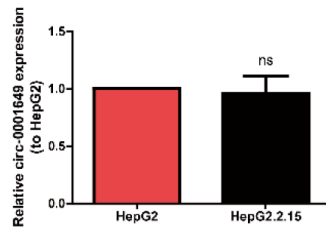**B**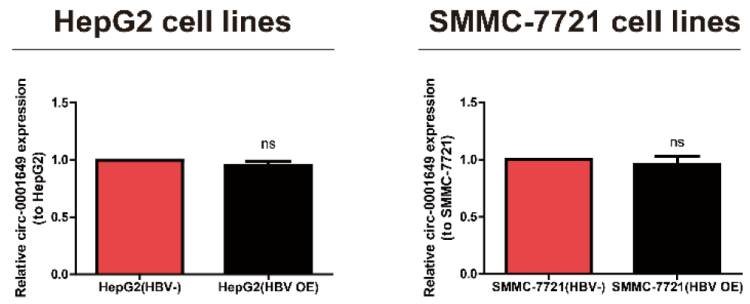

**Supplementary Figure 1. Differential expression of circ-0001649 in HBV-related HCC cells.** pHBV1.3 copy (the HBV1.3 expression plasmid) transfected into HepG2/SMMC-7721 cells, namely HepG2 (HBV OE) and SMMC-7721 (HBV OE), respectively. (A) The expression level of circ-0001649 in the stable HBV-producing cell line HepG2.2.15 was similar to that in its parental cell line HepG2. (B) After transfected with pHBV1.3 copy (the HBV1.3 expression plasmid), mRNA levels of circ-0001649 were detected by qRT-PCR. ns: no significant difference, data represent the mean  $\pm$  SD.
